# Supplementary material for: Rapid one-pot microwave-assisted synthesis and defect engineering of UiO-66 for enhanced CO2 capture
Source: Royal Society of Chemistry journal article supplement (doi:10.1039/d4ta06814a), 2024-11-29
Supplement: d4ta06814a1.pdf [file d4ta06814a1.pdf]

Supporting Information

Rapid One-pot Microwave-assisted Synthesis and Defect Engineering  
of UiO-66 for Enhanced CO<sub>2</sub> Capture

Dong A. Kang<sup>a</sup>, Amro M. O. Mohamed<sup>c</sup> Christian Murphy<sup>a</sup>, Andres Ramos<sup>a</sup>, Ioannis G.

Economou<sup>c</sup>, Jinsoo Kim<sup>d</sup>, and Hae-Kwon Jeong<sup>\*,a,b,d</sup>

<sup>a</sup>Artie McFerrin Department of Chemical Engineering and <sup>b</sup>Department of Materials  
Science and Engineering, Texas A&M University, 3122 TAMU, College Station, TX 77843-  
3122, United States

<sup>c</sup>Chemical Engineering Program, Texas A&M University at Qatar, PO Box 23874,  
Doha, Qatar

<sup>d</sup>Department of Chemical Engineering (Integrated Engineering), Kyung Hee  
University, 1732 Deogyong-daero, Yongin, Gyeonggi-do 17104, Republic of Korea

*\* Corresponding author*

*H.-K. Jeong (e-mail address: hjeong7@tamu.edu, Phone: +1-979-862-4850, Fax: +1-979-  
845-6446)*

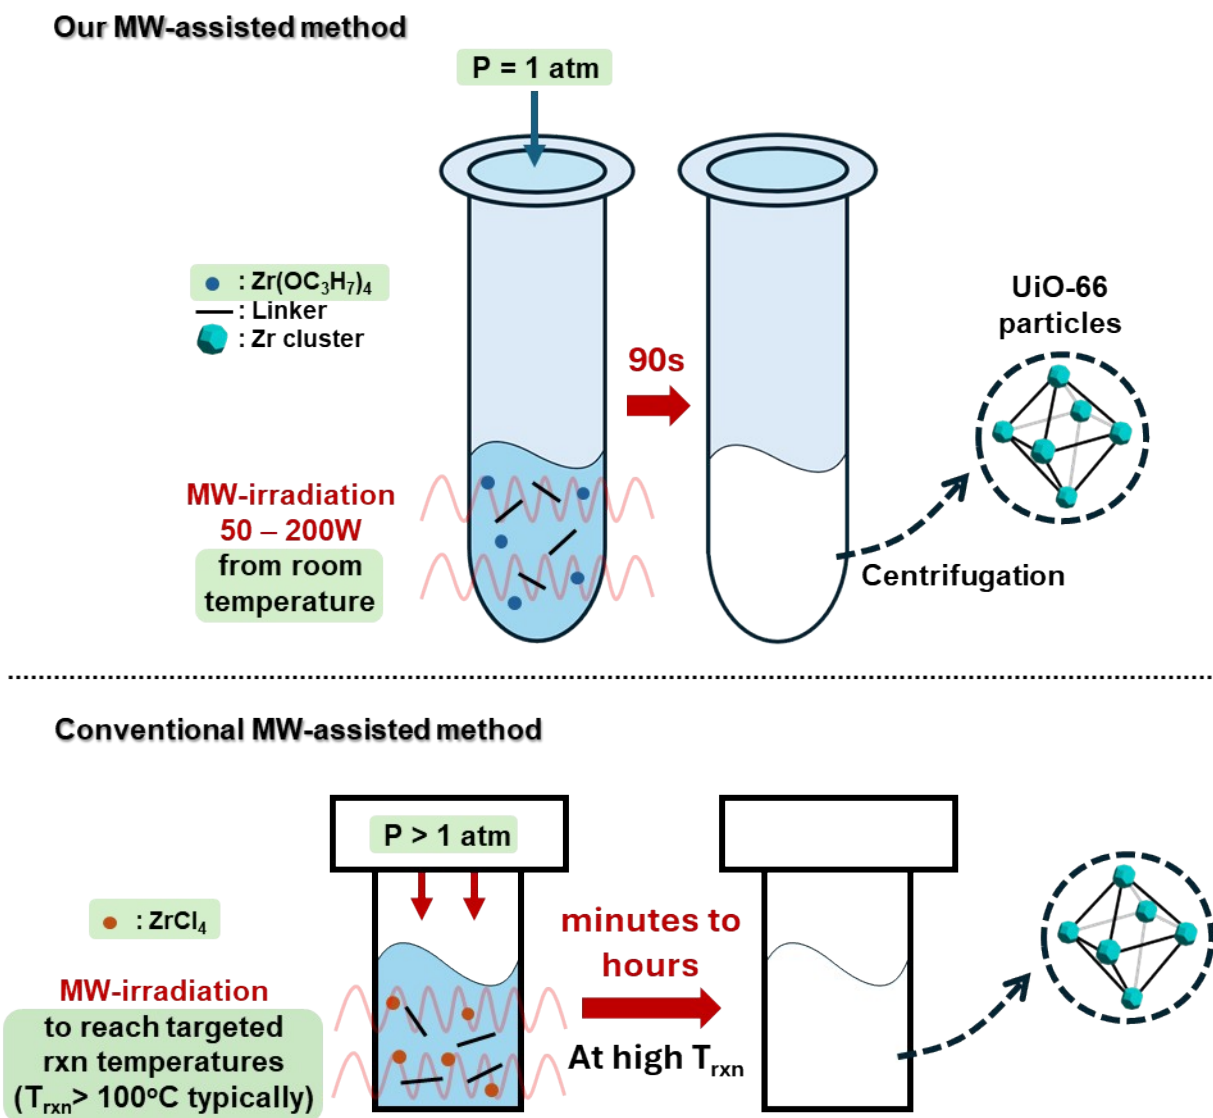

**Figure S1** Schematic illustration of our one-pot rapid MW-assisted synthesis compared to conventional MW-assisted synthesis methods (i.e., autogenous temperature vs. autogenous pressure).

**Table S1.** Comparison of MW-assisted synthesis methods for UiO-66 with literature.

| <b>Metal precursor</b>                           | <b>Radiation power (W)</b> | <b>Radiation time (mins)</b> | <b>Reaction temperature (°C)</b> | <b>Pressure (atm)</b> | <b>BET surface area (m<sup>2</sup>/g)</b> | <b>Yield (%)</b> | <b>Ref.</b> |
|--------------------------------------------------|----------------------------|------------------------------|----------------------------------|-----------------------|-------------------------------------------|------------------|-------------|
| Zr(OC <sub>3</sub> H <sub>7</sub> ) <sub>4</sub> | 50 – 200W                  | 1.5                          | -                                | 1                     | ~ 1731                                    | 25 - 64          | This work   |
| ZrCl <sub>4</sub>                                | 80<br>→ 200 (two step)     | 18                           | -                                | > 1<br>(autogenous)   | ~ 1206                                    | 78               | 1           |
|                                                  | -                          | 92                           | 180                              |                       | ~ 1789                                    | -                | 2           |
|                                                  | 350                        | 5 - 30                       | 80 – 120                         |                       | ~ 1320                                    | 45 – 91          | 3           |
|                                                  | 130                        | 3                            | 110                              |                       | -                                         | 88               | 4           |
|                                                  | -                          | 120                          | 100                              |                       | ~ 1661                                    | 80 – 90          | 5           |
|                                                  | -                          | 360                          | 80                               |                       | ~ 318                                     | -                | 6           |

**Table S2.** Detailed conditions of precursor solutions for synthesizing UiO-66.

| <b>70wt%<br/>Zr(OC<sub>3</sub>H<sub>7</sub>)<sub>4</sub><br/>solution</b> | <b>Zr</b> | <b>Linker</b>            | <b>DMF</b>          | <b>Acetic acid</b>  |
|---------------------------------------------------------------------------|-----------|--------------------------|---------------------|---------------------|
| 0.60 g                                                                    | 1.28 mmol | TA, 0.20g<br>(1.20 mmol) | 28 ml<br>(440 mmol) | 16 ml<br>(230 mmol) |

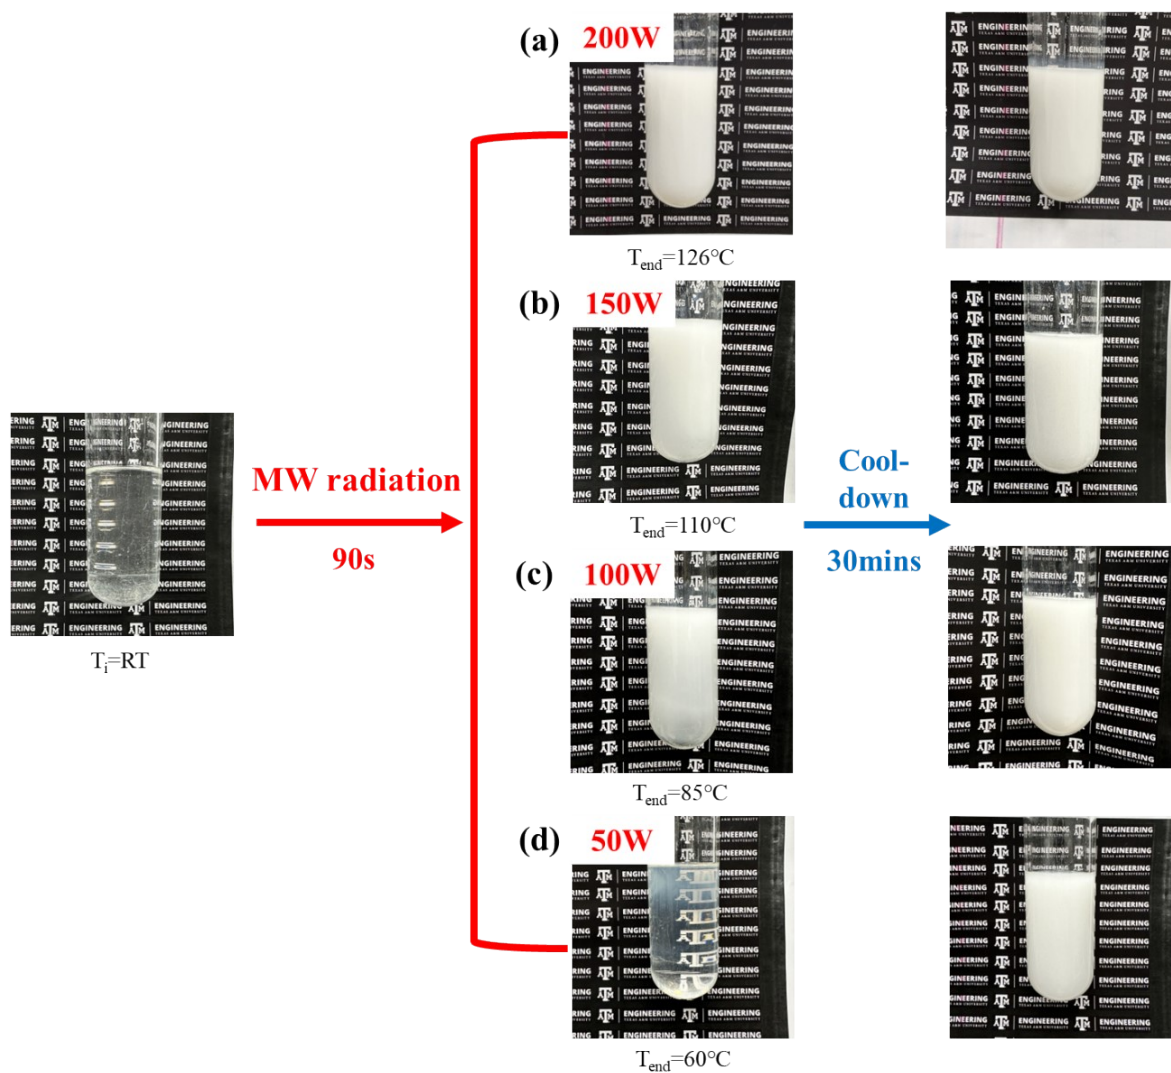

**Figure S2** Photographs of the synthesis process for UiO-66 under microwave irradiation ( $T_i$ : temperature before MW radiation and  $T_{end}$ : temperature after MW radiation).

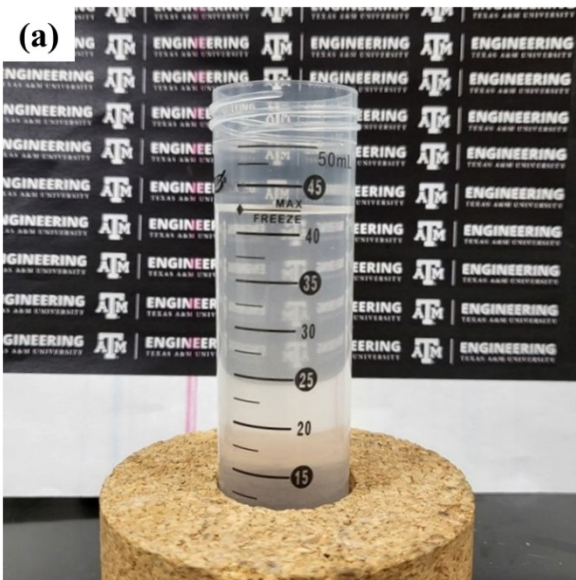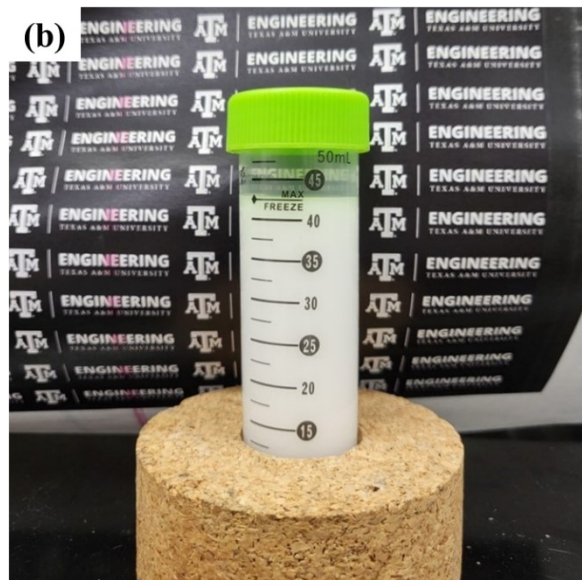

**Figure S3** Photographs of UiO-66 synthesis solutions: **(a)** before MW radiation and **(b)** after MW radiation at 200 W.

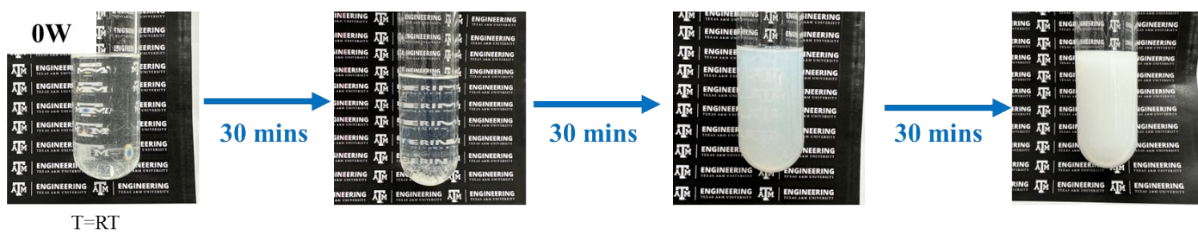

**Figure S4** Photographs of time-dependent UiO-66 synthesis solution without MW radiation.

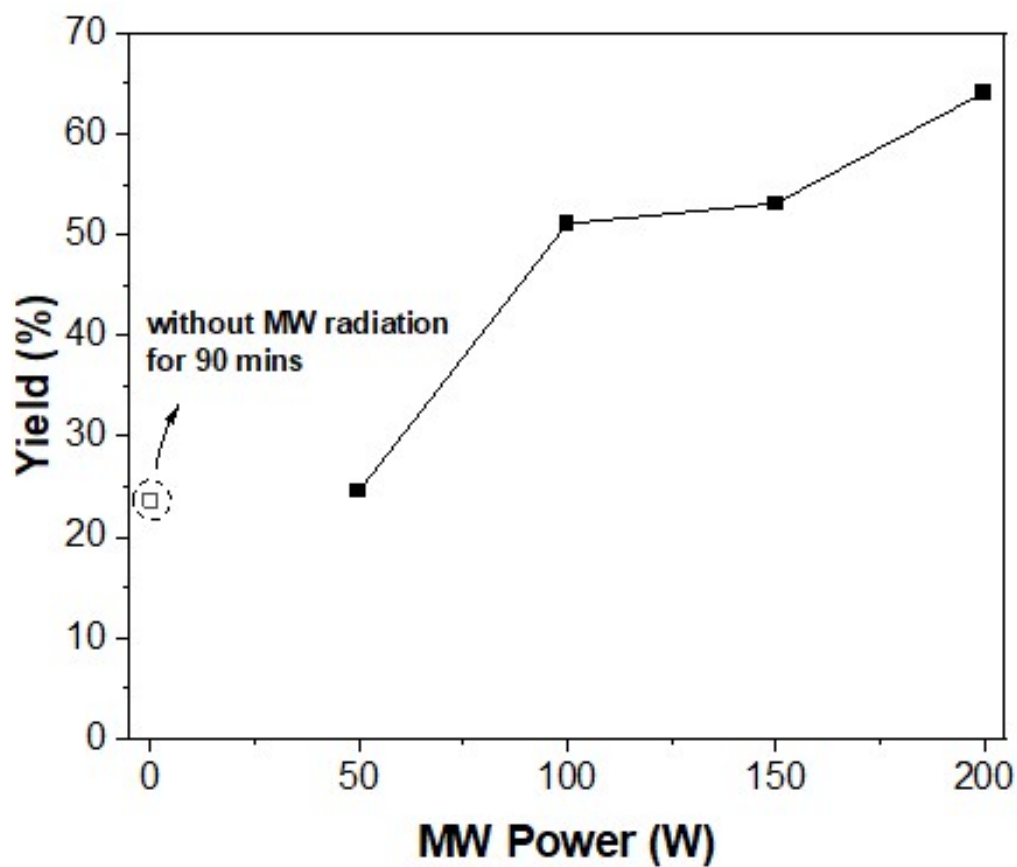

**Figure S5** Synthesis yields of MW-assisted synthesized UiO-66 in this work.



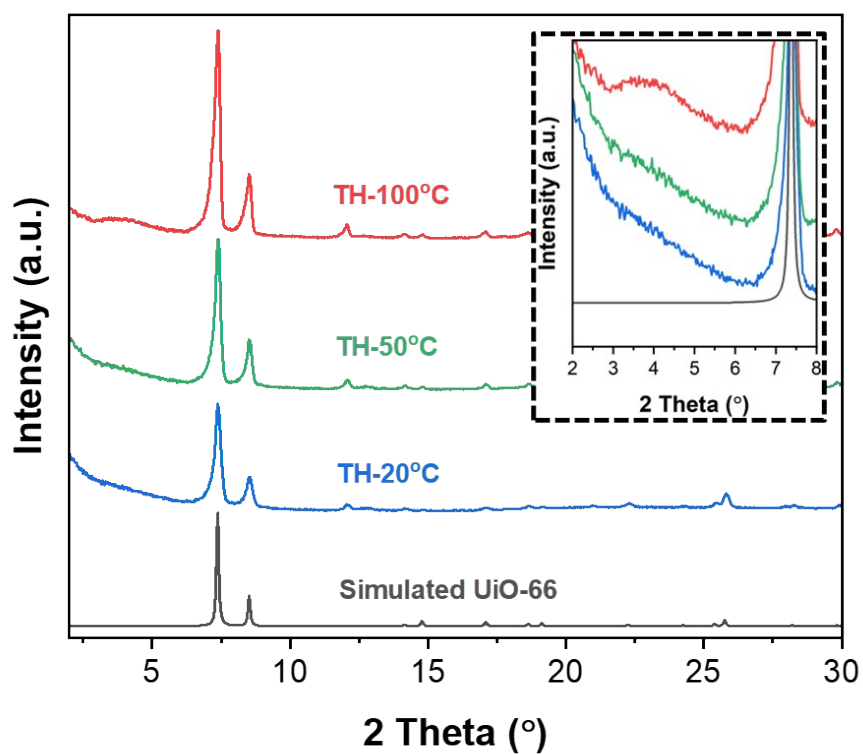

**Figure S6** PXRD patterns of UiO-66 synthesized by the thermal method at different synthesis temperatures.

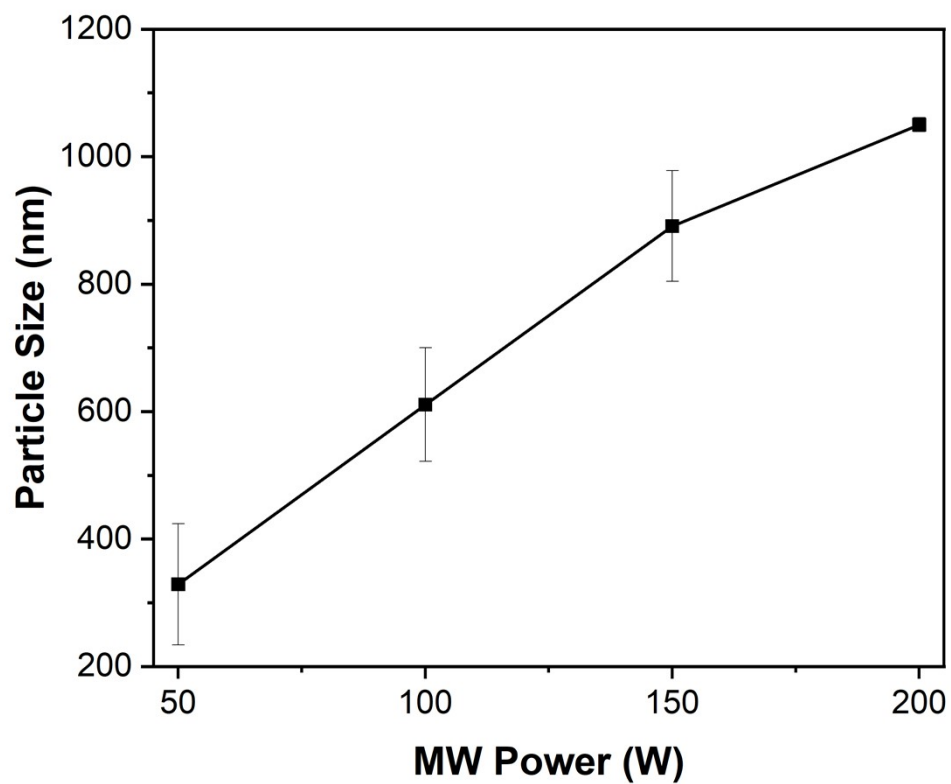

**Figure S7** Particle size of UiO-66 synthesized as a function of MW power.

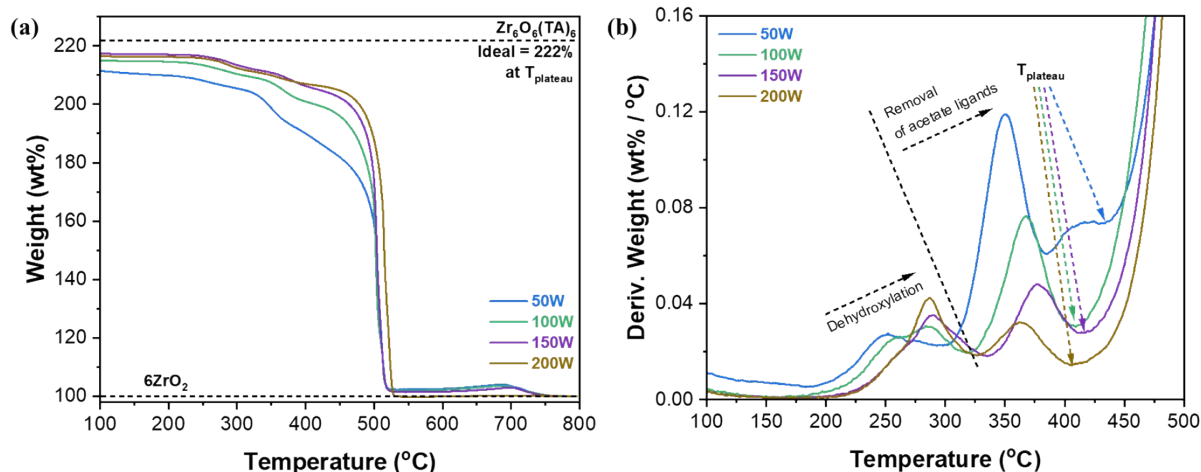

- (c)
1. At  $T_{\text{plateau}}$ , the sample is assumed to be  $\text{Zr}_6\text{O}_{6+x}(\text{TA})_{6-x}$  (ideal:  $\text{Zr}_6\text{O}_6(\text{TA})_6$ ) after desolvation (25-100°C), dehydroxylation (200-325°C), and removal of acetate ligand (~390°C) occur (Hence,  $x$  presents linker deficiencies per  $\text{Zr}_6$  unit (i.e., defectivity))
  2. A very large weight loss over a temperature range of ca. 390-525 °C due to the collapse of the MOF framework (via combustion of the TA linkers).
  3. At 800°C, the sample is assumed to become fully decomposed into  $6\text{ZrO}_2$
  4. Based on the assumptions above,

$$Wt_{\text{plateau}} = \frac{MW_{\text{Zr}_6\text{O}_{6+x}(\text{linker})_{6-x}}}{6 \times MW_{\text{ZrO}_2}} \times 100$$

where,  $MW_x$  presents the molecular weight of species  $x$ , and  $Wt_{\text{plateau}}$  presents the normalized weight percent of a sample at  $T_{\text{plateau}}$ , relative to the mass of  $\text{ZrO}_2$  in the TGA results.

**Figure S8 (a)** TGA and **(b)** DTG curves of UiO-66 synthesized at varying MW-radiation power, and **(c)** a method to calculate linker deficiencies per  $\text{Zr}_6$  unit (defectivity).

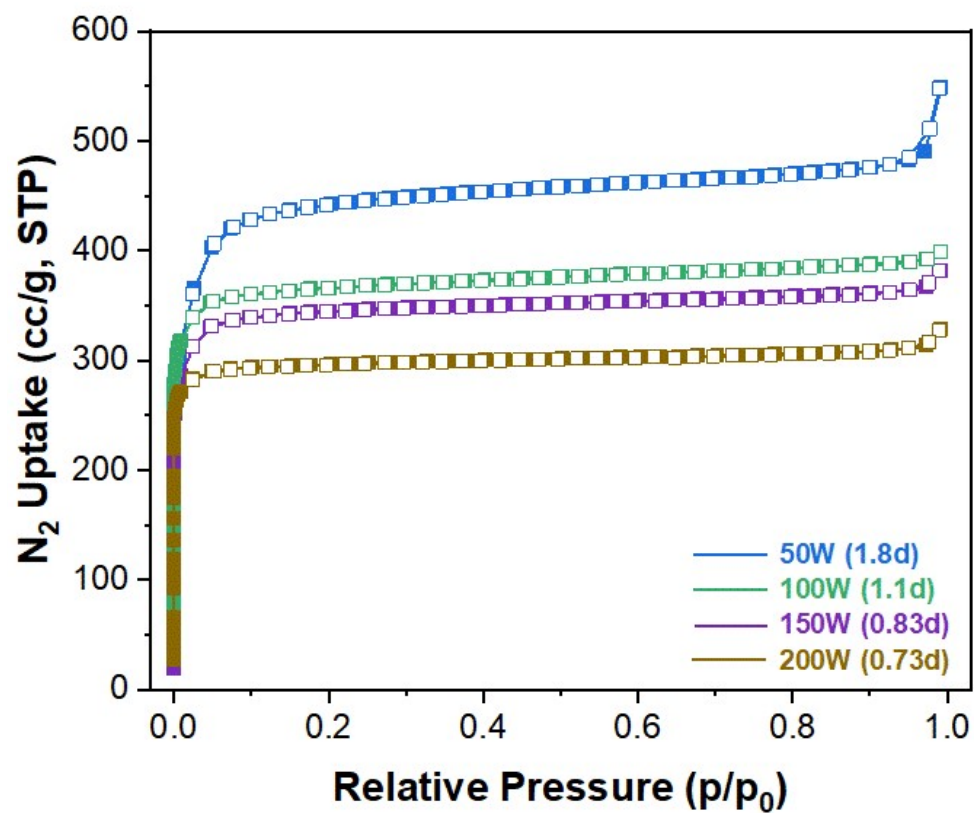

**Figure S9** N<sub>2</sub> isotherms at 77K of UiO-66 synthesized at varying MW-radiation power.

**Table S3.** Textural properties of UiO-66 synthesized at varying MW-radiation power.

| <b>MW Power</b> | <b>Defectivity<br/>(d)</b> | <b>S<sub>BET</sub><br/>(m<sup>2</sup>/g)</b> | <b>V<sub>mic</sub><br/>(cm<sup>3</sup>/g)</b> | <b>V<sub>t</sub><br/>(cm<sup>3</sup>/g)</b> |
|-----------------|----------------------------|----------------------------------------------|-----------------------------------------------|---------------------------------------------|
| 50 W            | 1.8                        | 1731                                         | 0.638                                         | 0.850                                       |
| 100 W           | 1.1                        | 1419                                         | 0.538                                         | 0.618                                       |
| 150 W           | 0.83                       | 1344                                         | 0.517                                         | 0.592                                       |
| 200 W           | 0.73                       | 1148                                         | 0.444                                         | 0.508                                       |

(S<sub>BET</sub>: BET surface area, V<sub>mic</sub>: micropore volume, V<sub>t</sub>: total pore volume). Defectivity (d) is defined as linker deficiencies per Zr<sub>6</sub> unit (see Fig. S7))

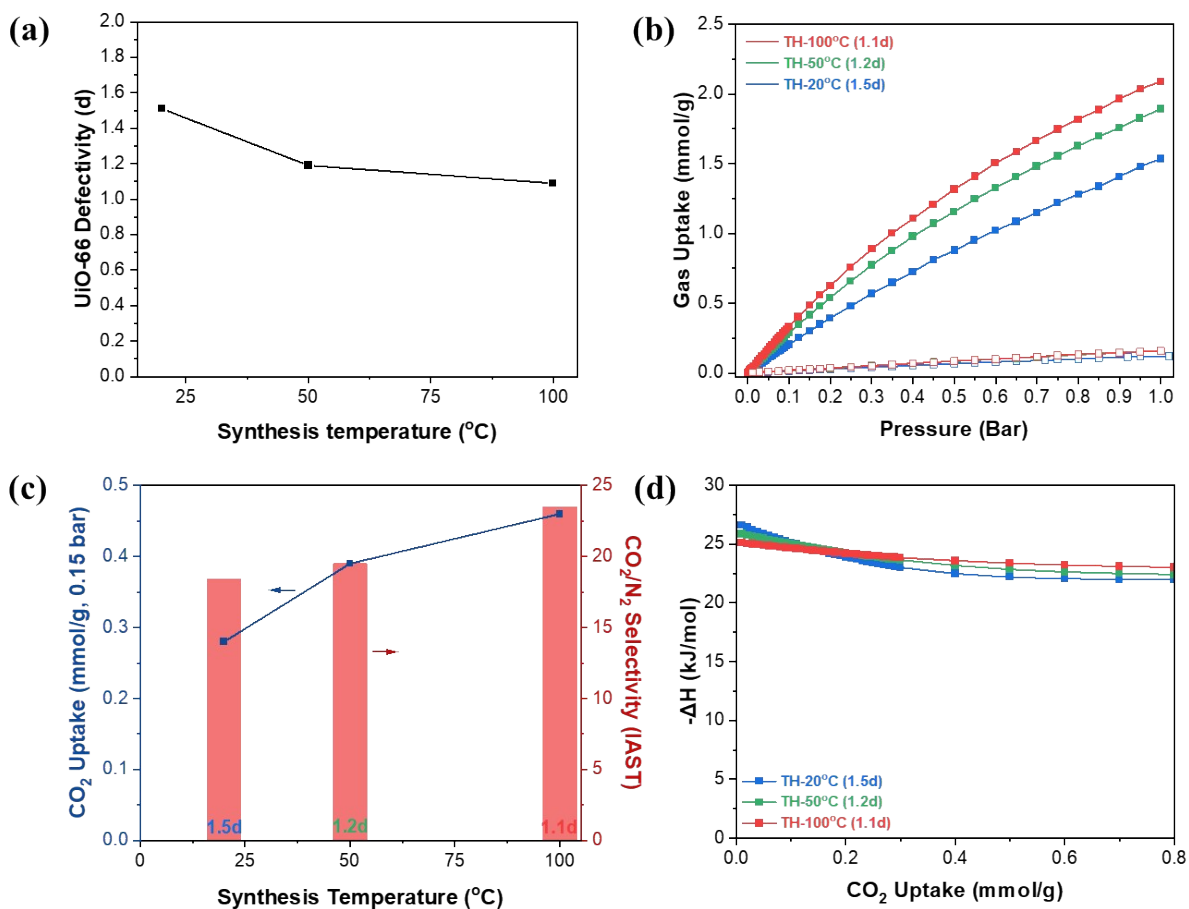

**Figure S10** (a) Defectivity (d) of thermally (TH)-synthesized UiO-66 as a function of synthesis temperature, (b) CO<sub>2</sub> and N<sub>2</sub> pure gas isotherms at 30°C of UiO-66 synthesized by the TH method at varying synthesis temperature, (c) IAST CO<sub>2</sub> uptake at 0.15 bar and CO<sub>2</sub>/N<sub>2</sub> selectivity as a function of synthesis temperature (line: CO<sub>2</sub> uptake (left axis), bar: CO<sub>2</sub>/N<sub>2</sub> selectivity (right axis)), and (d) CO<sub>2</sub> isosteric heat of adsorption of UiO-66 by the TH method at varying synthesis temperature.

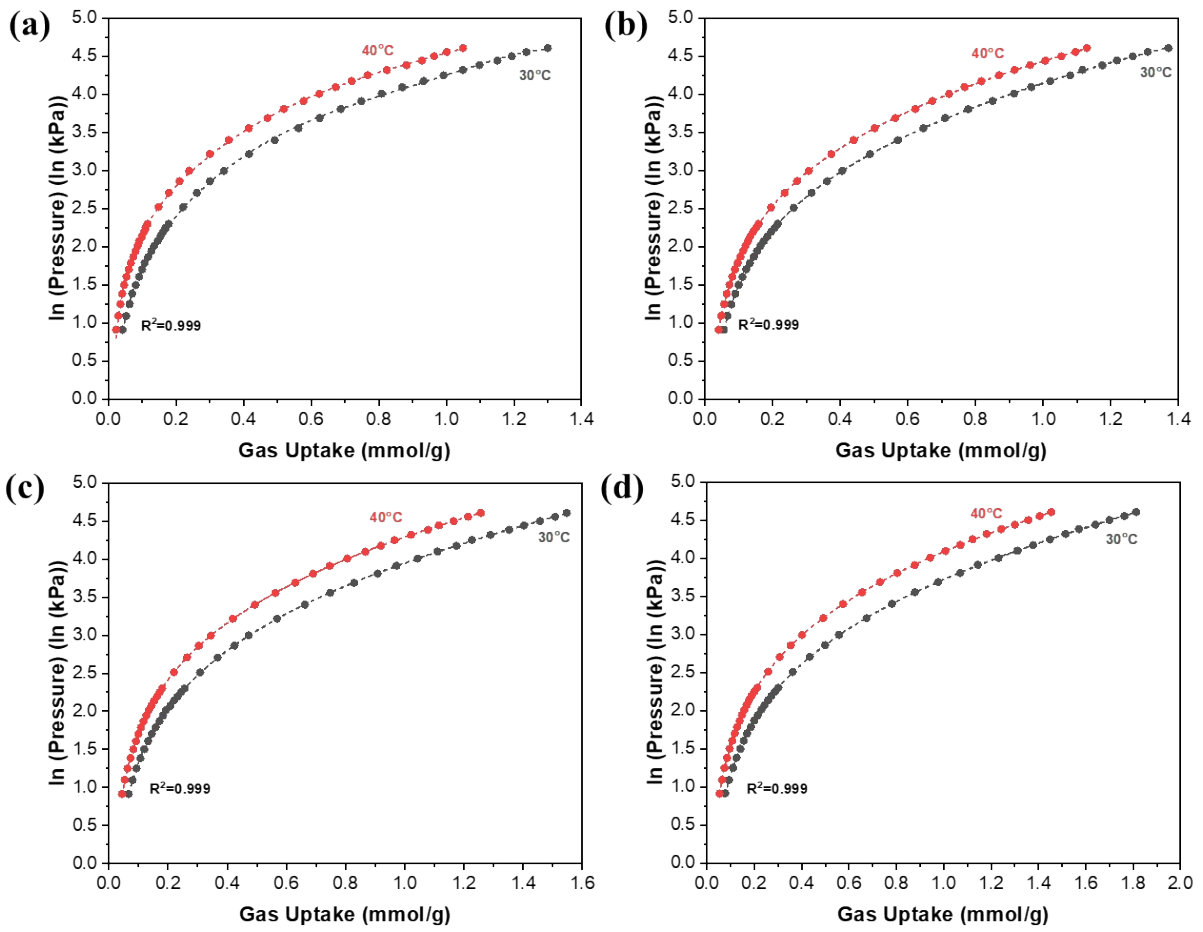

**Figure S11** CO<sub>2</sub> adsorption isotherms of UiO-66 synthesized at varying MW power at 30 and 40°C and their fits with virial equations: **(a)** 50 W, **(b)** 100 W, **(c)** 150 W and **(d)** 200 W (points: experimental, dashed lines: virial fitting).

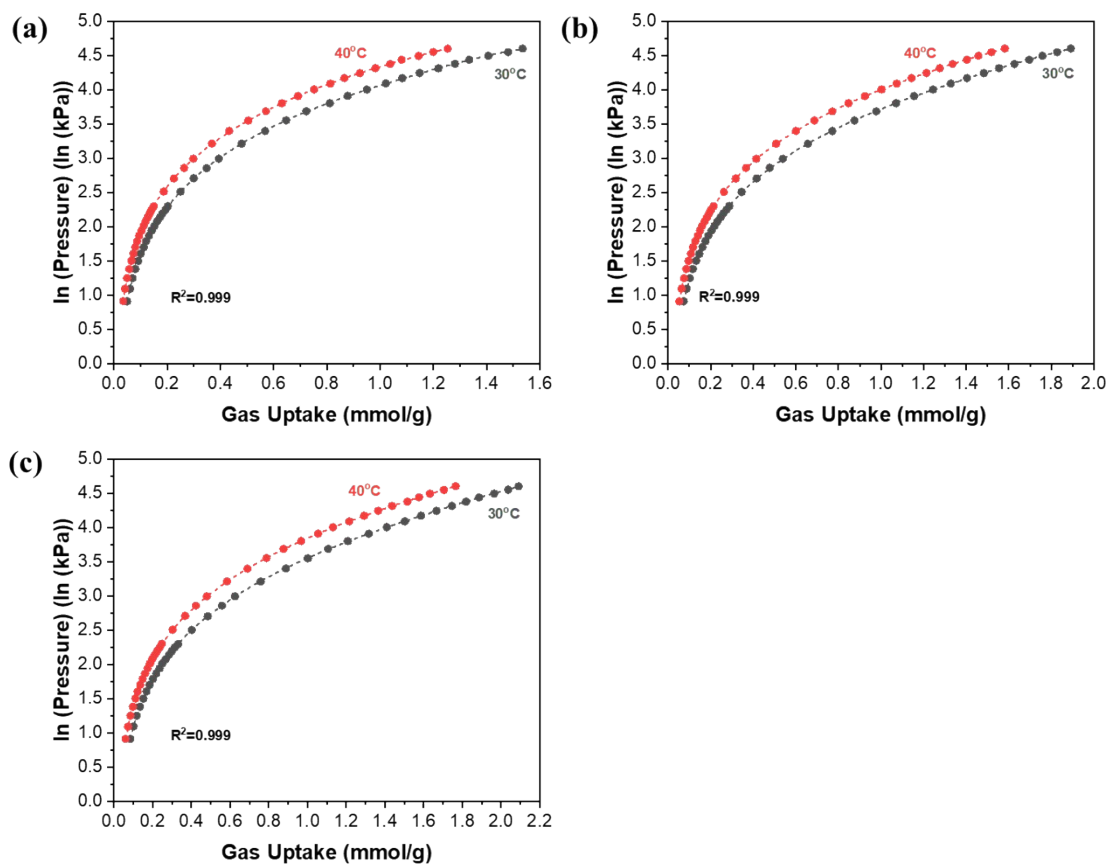

**Figure S12**  $\text{CO}_2$  adsorption isotherms of UiO-66 by the TH method at varying synthesis temperature at  $30$  and  $40^\circ\text{C}$  and their fits with virial equations: **(a)**  $20^\circ\text{C}$  **(b)**  $50^\circ\text{C}$  and **(c)**  $100^\circ\text{C}$  (points: experimental, dashed lines: virial fitting).



**Table S4.** Comparison of CO<sub>2</sub> capacity and CO<sub>2</sub>/N<sub>2</sub> selectivity of UiO-66 with those in literatures.

| Synthesis method | CO <sub>2</sub> capacity<br>(at 0.15 bar, mmol/g) | CO <sub>2</sub> /N <sub>2</sub> selectivity<br>(ideal) | CO <sub>2</sub> /N <sub>2</sub> selectivity<br>(IAST) | Temperature<br>(°C) | Ref       |
|------------------|---------------------------------------------------|--------------------------------------------------------|-------------------------------------------------------|---------------------|-----------|
| MW-assisted      | 0.26                                              | 24.5                                                   | 41 <sup>a</sup>                                       | 30                  | This work |
| Solvothermal     | 0.55                                              | -                                                      | 22.8 <sup>a</sup>                                     | 25                  | 7         |
|                  | 0.50                                              | -                                                      | 20 <sup>b</sup>                                       | 25                  | 8         |
|                  | 0.40                                              | 18                                                     | -                                                     | 25                  | 9         |
|                  | 0.44                                              | -                                                      | 25 <sup>b</sup>                                       | 25                  | 10        |

(<sup>a</sup>: at 0.15 bar CO<sub>2</sub> / 0.85 bar N<sub>2</sub> and <sup>b</sup>: at 0.5 bar CO<sub>2</sub> / 0.5 bar N<sub>2</sub>)

**Table S5.** Computational largest cavity parameter (LCD) and pore limiting diameter (LPD) for pristine UiO-66 and defective structures. The three values in each in LCD and PLD in every row provide the values for each crystallographic direction.

| Linker deficiency<br>(per Zr <sub>6</sub> node) | LCD (Å) |       |       | PLD (Å) |       |       |
|-------------------------------------------------|---------|-------|-------|---------|-------|-------|
|                                                 | 0       | 8.452 |       |         | 3.785 |       |
| 0.25                                            | 8.550   | 8.413 | 8.432 | 3.785   | 3.790 | 3.791 |
| 0.5                                             | 8.550   | 8.432 | 8.432 | 3.785   | 3.840 | 4.900 |
| 0.75                                            | 8.550   | 8.430 | 8.432 | 6.253   | 3.840 | 4.900 |
| 1                                               | 8.550   | 8.432 | 8.432 | 6.253   | 3.840 | 4.899 |
| 1.25                                            | 8.550   | 8.432 | 8.432 | 6.681   | 3.840 | 4.928 |
| 1.5                                             | 8.550   | 8.432 | 8.433 | 6.952   | 3.840 | 4.786 |
| 1.75                                            | 8.550   | 8.432 | 8.428 | 6.952   | 3.840 | 4.874 |
| 2                                               | 8.550   | 8.432 | 8.408 | 6.952   | 3.842 | 5.191 |

## References

1. M. Taddei, P. V. Dau, S. M. Cohen, M. Ranocchiari, J. A. van Bokhoven, F. Costantino, S. Sabatini and R. Vivani, *Dalton transactions*, 2015, **44**, 14019-14026.
2. W. Liang, C. J. Coghlan, F. Ragon, M. Rubio-Martinez, D. M. D'Alessandro and R. Babarao, *Dalton Transactions*, 2016, **45**, 4496-4500.
3. T. K. Vo, V. N. Le, K. S. Yoo, M. Song, D. Kim and J. Kim, *Crystal Growth & Design*, 2019, **19**, 4949-4956.
4. L. H. T. Nguyen, T. T. T. Nguyen, Y. T. Dang, P. H. Tran and T. Le Hoang Doan, *Asian Journal of Organic Chemistry*, 2019, **8**, 2276-2281.
5. Y. Li, Y. Liu, W. Gao, L. Zhang, W. Liu, J. Lu, Z. Wang and Y.-J. Deng, *CrystEngComm*, 2014, **16**, 7037-7042.
6. M. Yahia, L. A. Lozano, J. M. Zamaro, C. Téllez and J. Coronas, *Separation and Purification Technology*, 2024, **330**, 125558.
7. G. E. Cmarik, M. Kim, S. M. Cohen and K. S. Walton, *Langmuir*, 2012, **28**, 15606-15613.
8. N. C. Pham, T. K. Vo, Q. B. Nguyen, T. K. Nguyen, T. H. C. Nguyen, N. N. Dao, J. Kim and V. C. Nguyen, *Inorganic Chemistry Communications*, 2023, **158**, 111476.
9. A. Huang, L. Wan and J. Caro, *Materials Research Bulletin*, 2018, **98**, 308-313.
10. J. Yan, T. Ji, Y. Sun, S. Meng, C. Wang and Y. Liu, *Journal of Membrane Science*, 2022, **661**, 120959.
